# Supplementary material
Source: Springer Nature journal article supplement (https://www.springermedizin.de/resource/supplementary/12885_2014_5055_MOESM3_ESM.pdf/9468260)
Supplement: MOESM3 [file 9468260]

**Additional Table 3 Univariate prognostic analysis stratified by ypTNM stage**

|                              | ypStage I |          | ypStage II |          | ypStage III |          |
|------------------------------|-----------|----------|------------|----------|-------------|----------|
|                              | 5-YSR(%)  | <i>P</i> | 5-YSR(%)   | <i>P</i> | 5-YSR(%)    | <i>P</i> |
| Gender                       |           | 0.966    |            | 0.905    |             | 0.733    |
| Male                         | 90        |          | 82         |          | 57          |          |
| Female                       | 91        |          | 81         |          | 59          |          |
| Age at diagnosis, years      |           | 0.096    |            | 0.864    |             | 0.679    |
| 66-70                        | 94        |          | 82         |          | 60          |          |
| 71-75                        | 91        |          | 83         |          | 58          |          |
| 76-80                        | 84        |          | 80         |          | 58          |          |
| >80                          | 94        |          | 79         |          | 56          |          |
| Race                         |           | 0.355    |            | 0.572    |             | 0.655    |
| White                        | 91        |          | 82         |          | 58          |          |
| Black                        | 81        |          | 81         |          | 48          |          |
| Asian                        | 88        |          | 82         |          | 66          |          |
| Other                        | 100       |          | 73         |          | 60          |          |
| Residence location           |           | 0.703    |            | 0.133    |             | 0.027    |
| Big Metro                    | 89        |          | 84         |          | 58          |          |
| Metro or Urban               | 91        |          | 78         |          | 53          |          |
| Less Urban or Rural          | 94        |          | 83         |          | 77          |          |
| Marital status               |           | 0.713    |            | 0.227    |             | 0.928    |
| Single                       | 86        |          | 76         |          | 58          |          |
| Married                      | 92        |          | 83         |          | 59          |          |
| Widow/divorce                | 88        |          | 78         |          | 57          |          |
| Other                        | 90        |          | 100        |          | 49          |          |
| Median household income      |           | 0.525    |            | 0.363    |             | 0.129    |
| 1st quartile                 | 91        |          | 83         |          | 65          |          |
| 2nd quartile                 | 88        |          | 78         |          | 57          |          |
| 3rd quartile                 | 95        |          | 78         |          | 48          |          |
| 4th quartile                 | 88        |          | 85         |          | 63          |          |
| Unknown                      | 100       |          | 100        |          | 100         |          |
| Less than 12 years education |           | 0.915    |            | 0.503    |             | 0.320    |
| 1st quartile                 | 90        |          | 85         |          | 64          |          |
| 2nd quartile                 | 92        |          | 80         |          | 48          |          |
| 3rd quartile                 | 92        |          | 83         |          | 56          |          |
| 4th quartile                 | 89        |          | 78         |          | 64          |          |
| Unknown                      | 100       |          | 100        |          | 100         |          |
| Year of diagnosis            |           | 0.203    |            | 0.081    |             | 0.069    |
| 1992-1996                    | 100       |          | 70         |          | 50          |          |
| 1997-2000                    | 97        |          | 78         |          | 50          |          |
| 2001-2004                    | 88        |          | 80         |          | 57          |          |
| 2005-2008                    | 91        |          | 85         |          | 63          |          |
| Histologic type              |           | 0.212    |            | <0.001   |             | 0.029    |

|                               |     |       |       |        |
|-------------------------------|-----|-------|-------|--------|
| Adenocarcinoma                | 90  | 84    | 61    |        |
| Mucinous carcinoma            | 100 | 67    | 50    |        |
| Signet-ring cell carcinoma    | N/A | 0     | 31    |        |
| Histologic grade              |     | 0.454 | 0.539 | 0.001  |
| Well                          | 97  | 81    | 69    |        |
| Moderate                      | 90  | 81    | 61    |        |
| Poor                          | 85  | 77    | 44    |        |
| Undifferentiated              | N/A | 100   | 33    |        |
| Unknown                       | 95  | 87    | 69    |        |
| ypT category                  |     | 0.689 | 0.001 | 0.005  |
| ypT1                          | 91  | N/A   | 64    |        |
| ypT2                          | 90  | N/A   | 69    |        |
| ypT3                          | N/A | 83    | 58    |        |
| ypT4a                         | N/A | 81    | 67    |        |
| ypT4b                         | N/A | 61    | 29    |        |
| ypN category                  |     | N/A   | N/A   | <0.001 |
| ypN0                          | 91  | 82    | N/A   |        |
| ypN1a                         | N/A | N/A   | 65    |        |
| ypN1b                         | N/A | N/A   | 60    |        |
| ypN2a                         | N/A | N/A   | 57    |        |
| ypN2b                         | N/A | N/A   | 34    |        |
| Intestinal obstruction        |     | 0.360 | 0.115 | 0.379  |
| No                            | 91  | 82    | 59    |        |
| Yes                           | 84  | 76    | 51    |        |
| Intestinal perforation        |     | N/A   | 0.134 | N/A    |
| No                            | 91  | 82    | 58    |        |
| Yes                           | N/A | 50    | N/A   |        |
| Postoperative radiotherapy    |     | 0.262 | 0.004 | 0.559  |
| No                            | 90  | 84    | 59    |        |
| Yes                           | 95  | 68    | 54    |        |
| HCC risk score                |     | 0.447 | 0.417 | 0.344  |
| 1st quartile                  | 94  | 84    | 59    |        |
| 2nd quartile                  | 90  | 83    | 66    |        |
| 3rd quartile                  | 91  | 82    | 55    |        |
| 4th quartile                  | 88  | 77    | 54    |        |
| Number of examined lymph node |     | 0.549 | 0.100 | 0.533  |
| ≥12                           | 92  | 85    | 54    |        |
| <12                           | 90  | 80    | 60    |        |

**Abbreviation:** N/A, Not Available; HCC, Hierarchical Condition Categories; 5-YSR, Five years survival rate.
